# Supplementary material for: Antioxidant and Antiproliferative Activity of Finasteride against Glioblastoma Cells
Source: MDPI journal article supplement (doi:10.3390/pharmaceutics13091410), 2021-09-06
Supplement: s1 [file s1]

Supplementary Figure S1

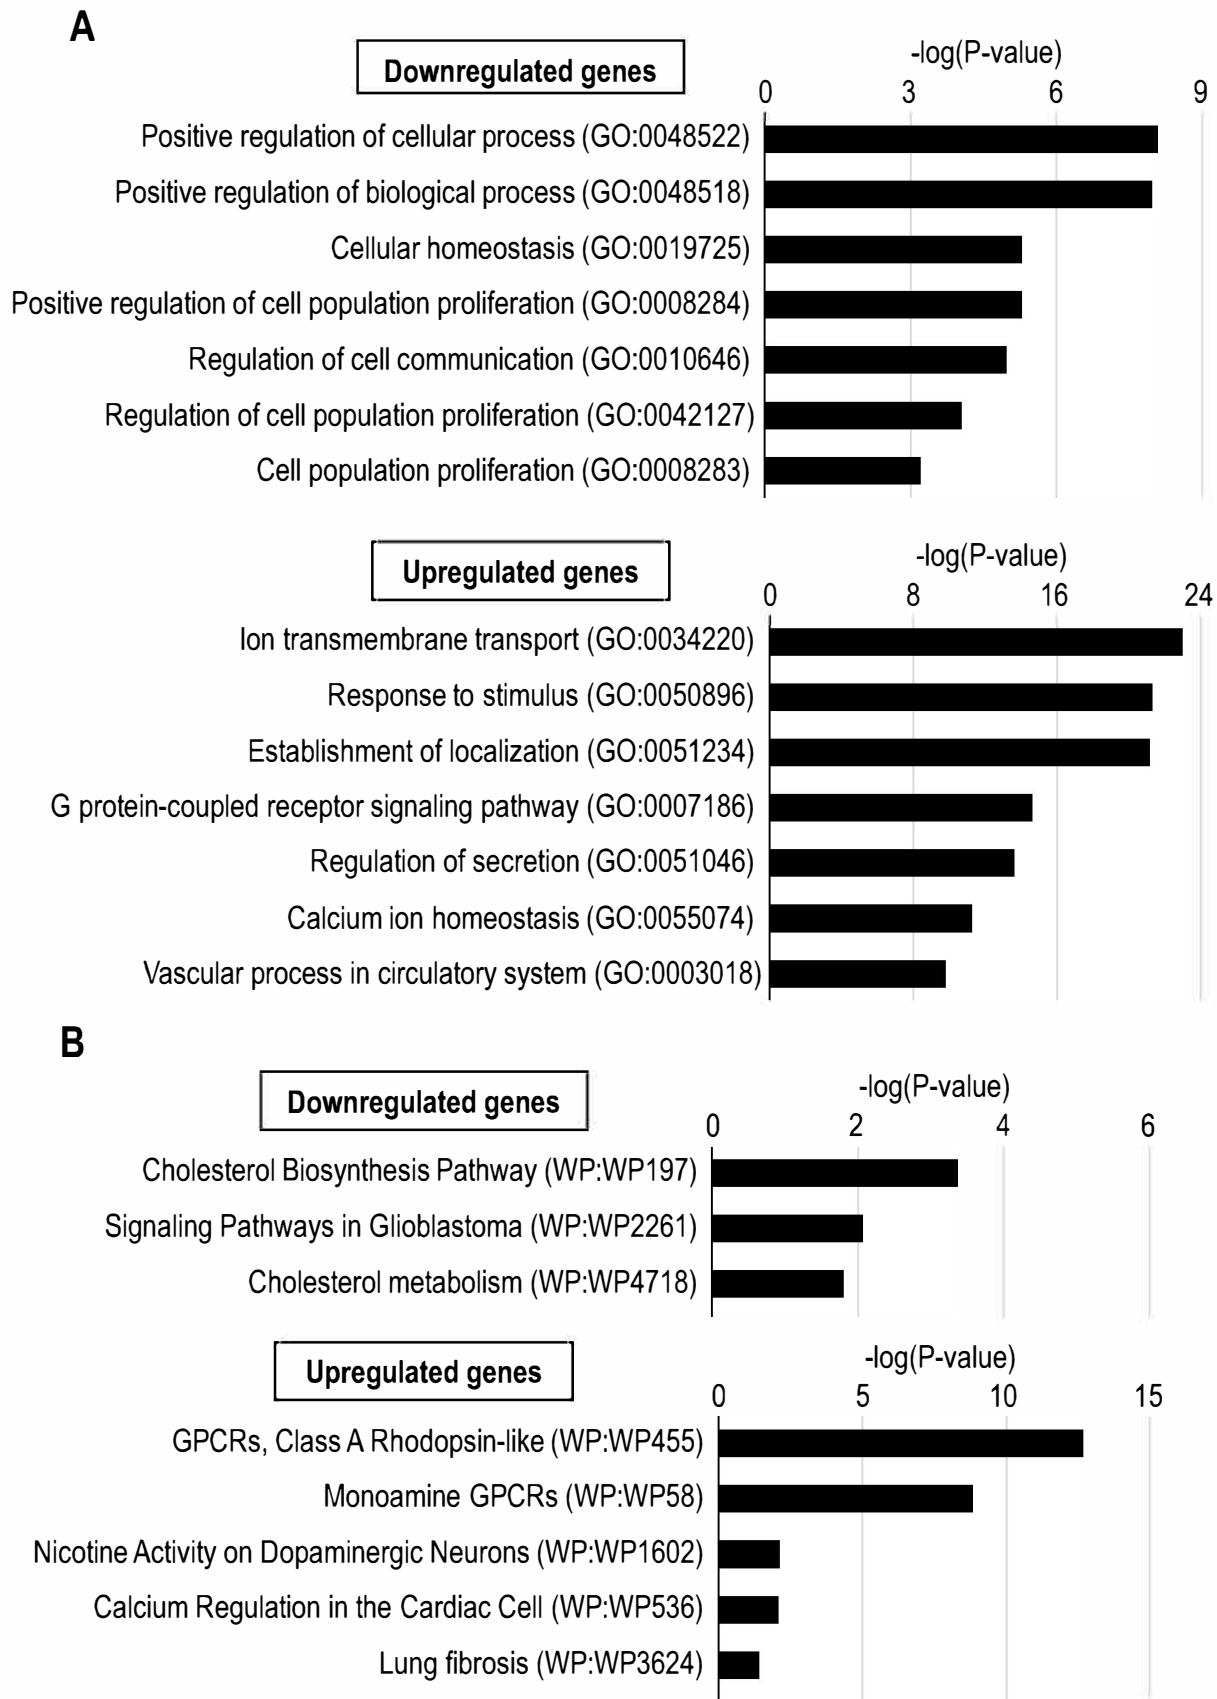

**Supplementary Figure S1. Transcriptome analysis of finasteride-treated glioblastoma cells.** (A and B) mRNA profiles of corn oil or finasteride administrated rat livers were extracted and analyzed from NCBI GEO profile database (GEO accession: GSE8251). Determination of upregulated genes was based on fold-change of the expression level  $> 2$  and a  $p\text{-value} < 0.05$ . Determination of downregulated genes was based on fold-change of the expression level  $< 0.5$  and a  $p\text{-value} < 0.05$ . GO enrichment analysis for the biological process (A) and biological pathway analysis (B) of up- or down-regulated genes post finasteride treatment were conducted by utilizing g:Profiler.

Supplementary Figure S2

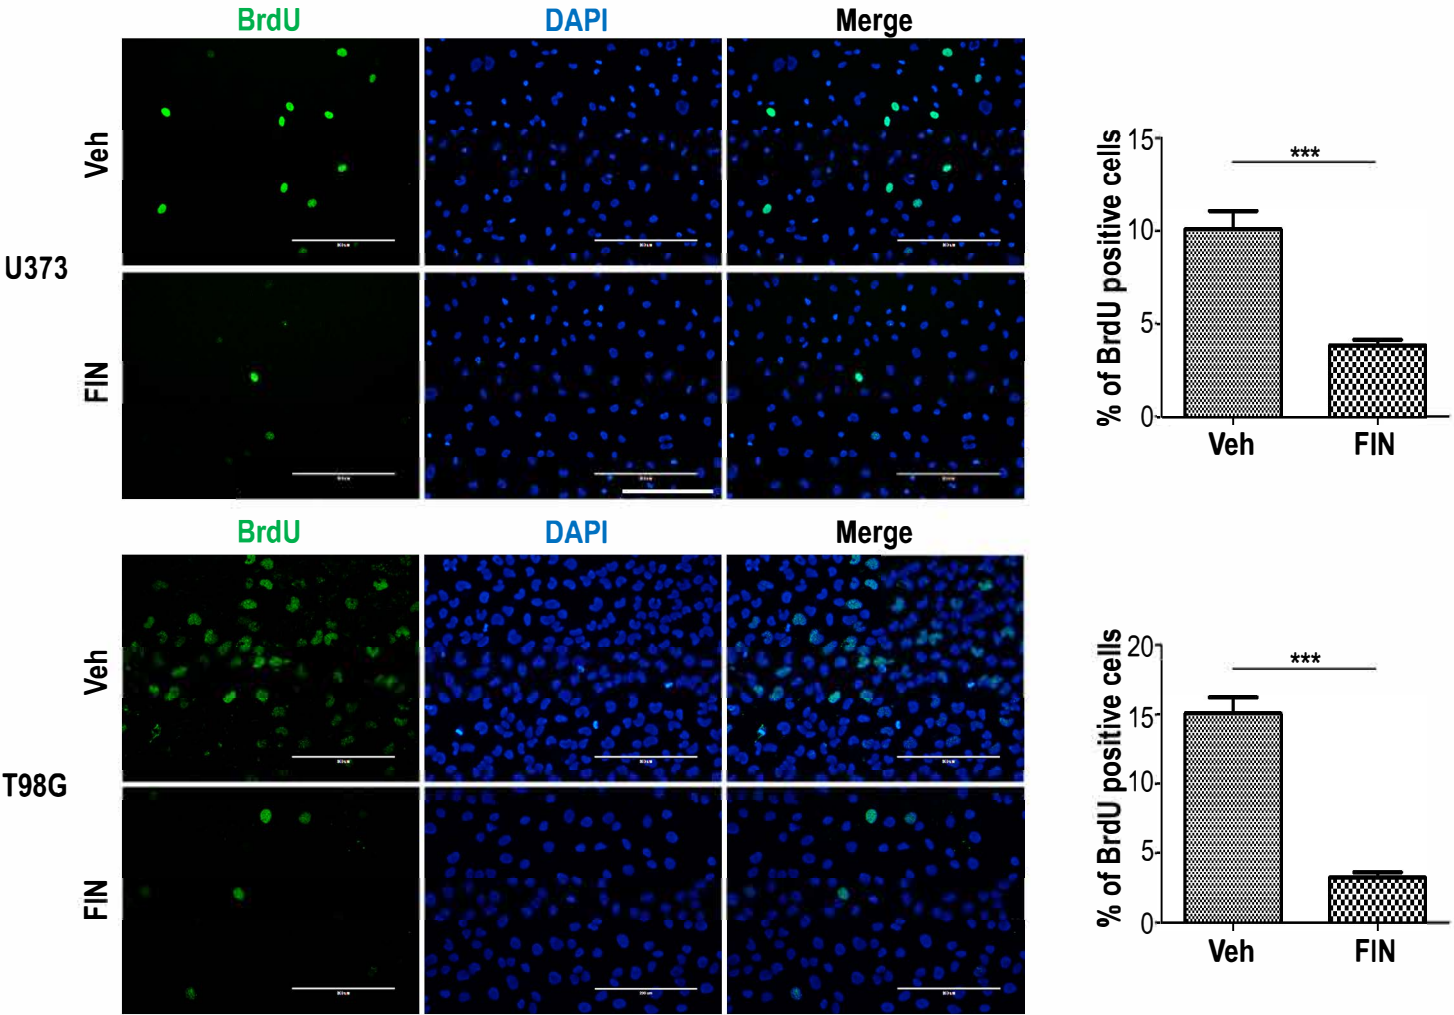

**Supplementary Figure S2. The effect of finasteride on cell cycle progression.** BrdU staining was performed in vehicle- or FIN-treated cells. Green signals indicated BrdU-positive cells. Nuclear DAPI (4',6-diamidino-2-phenylindole) staining is shown in blue (left). The quantification of BrdU-positive cell proportions in vehicle- or FIN-treated cells (right).
